# Supplementary material
Source: PubMed Central journal article supplement (PMC6855275)
Supplement: Supp_Fig1.pdf [file Supp_Fig1.pdf]

## Supplementary Data

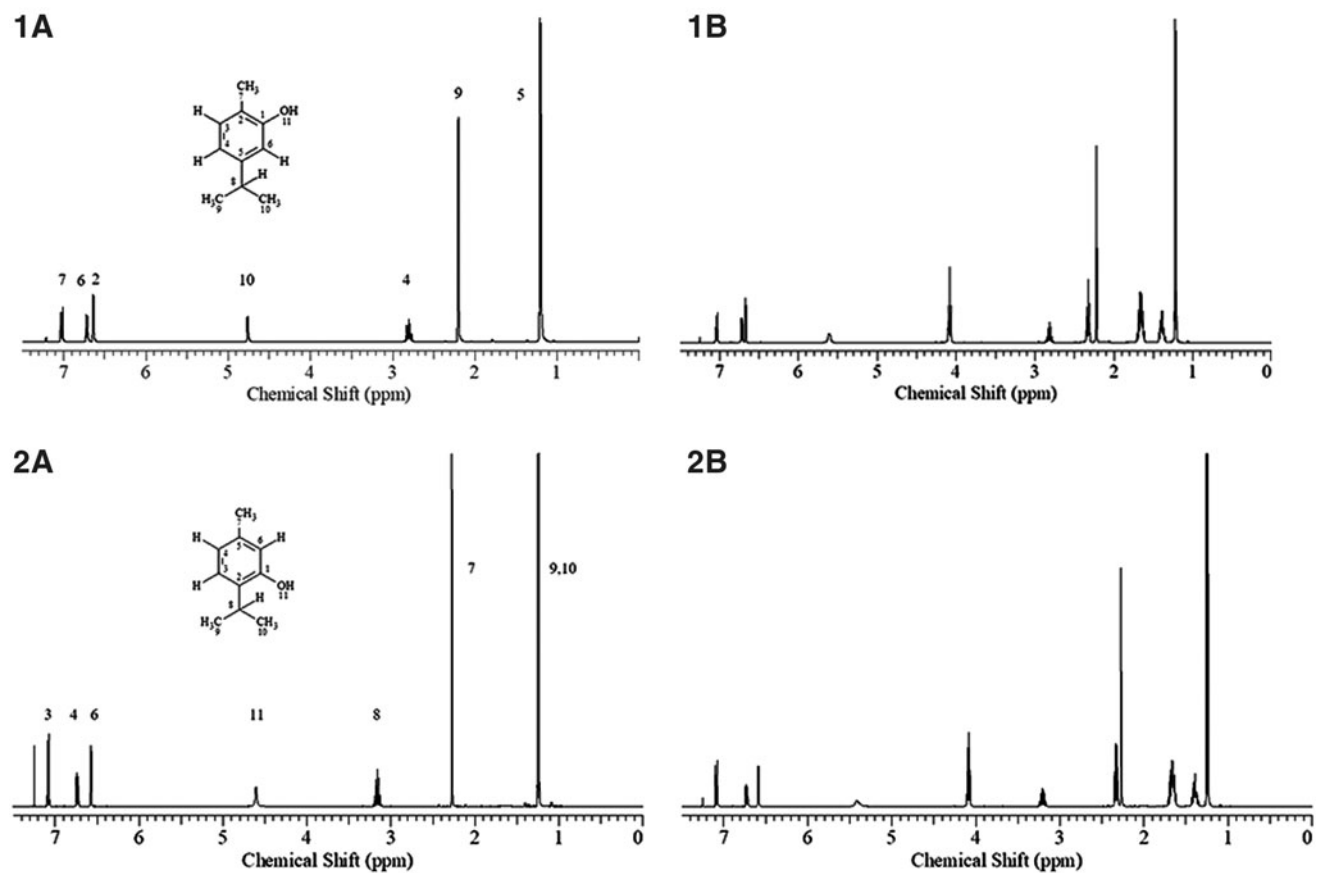

**Supplementary Figure S1.** (1-A) CAR structure and  $^1\text{H}$  NMR spectrum of CAR. (1-B)  $^1\text{H}$  NMR spectrum of CAR/PCL fibers. (2-A) THY structure and  $^1\text{H}$  NMR spectrum of THY. (2-B)  $^1\text{H}$  NMR spectrum of THY/PCL fibers. CAR, carvacrol; NMR, nuclear magnetic resonance; PCL, polycaprolactone; THY, thymol.
