# Supplementary material
Source: PubMed Central journal article supplement (PMC6855275)
Supplement: Supp_Fig2.pdf [file Supp_Fig2.pdf]

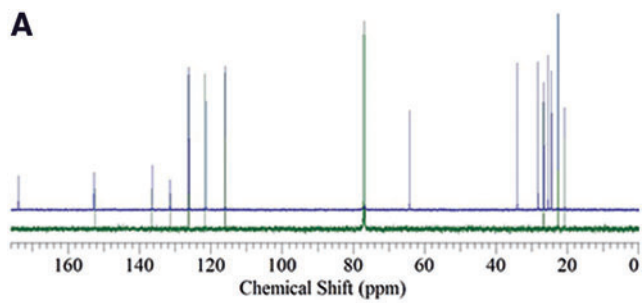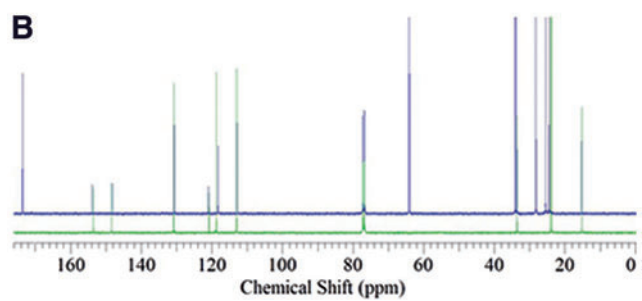

**Supplementary Figure S2.** (A) Full <sup>13</sup>C NMR spectrum of THY (*green line*) and THY/PCL mixture (*blue line*). (B) Full <sup>13</sup>C NMR spectrum of CAR (*green line*) and CAR/PCL mixture (*blue line*).

---
