# Supplementary material
Source: PubMed Central journal article supplement (PMC6855275)
Supplement: Supp_Table1.pdf [file Supp_Table1.pdf]

**Supplementary Table S1.**  $^{13}\text{C}$  nuclear magnetic resonance chemical shifts ( $\delta$ , ppm) of carvacrol, a mixture of carvacrol and polycaprolactone (50/50, w/w), and shift variation ( $\Delta\delta$ )

| CAR $^{13}\text{C}$ NMR<br>( $\text{CDCl}_3$ ) $\delta$ (ppm) | CAR:PCL<br>(50/50, w/w) $^{13}\text{C}$ NMR<br>( $\text{CDCl}_3$ ) $\delta$ (ppm) |                                       | Carbon No. |
|---------------------------------------------------------------|-----------------------------------------------------------------------------------|---------------------------------------|------------|
|                                                               |                                                                                   | Shift<br>Variation ( $\Delta\delta$ ) |            |
| 153.57                                                        | 153.93                                                                            | +0.36                                 | 1          |
| 148.43                                                        | 148.10                                                                            | -0.33                                 | 5          |
| 130.80                                                        | 130.66                                                                            | -0.14                                 | 3          |
| 120.84                                                        | 121.03                                                                            | +0.19                                 | 2          |
| 118.78                                                        | 118.30                                                                            | -0.48                                 | 4          |
| 113.02                                                        | 112.90                                                                            | -0.12                                 | 6          |
| 33.64                                                         | 33.58                                                                             | -0.06                                 | 8          |
| 23.94                                                         | 23.93                                                                             | -0.01                                 | 9 and 10   |
| 15.25                                                         | 15.31                                                                             | +0.06                                 | 7          |

CAR, carvacrol; NMR, nuclear magnetic resonance; PCL, polycaprolactone; THY, thymol.
