# Supplementary material
Source: PubMed Central journal article supplement (PMC6855275)
Supplement: Supp_Table2.pdf [file Supp_Table2.pdf]

**Supplementary Table S2.**  $^{13}\text{C}$  nuclear magnetic resonance chemical shifts ( $\delta$ , ppm) of thymol, a mixture of thymol and polycaprolactone (50/50, w/w), and shift variation ( $\Delta\delta$ )

| THY $^{13}\text{C}$ NMR<br>( $\text{CDCl}_3$ ) $\delta$ (ppm) | THY:PCL (50/50, w/w)                                      |                                    | Carbon No. |
|---------------------------------------------------------------|-----------------------------------------------------------|------------------------------------|------------|
|                                                               | $^{13}\text{C}$ NMR<br>( $\text{CDCl}_3$ ) $\delta$ (ppm) | Shift Variation ( $\Delta\delta$ ) |            |
| 152.50                                                        | 152.75                                                    | +0.25                              | 1          |
| 136.59                                                        | 136.35                                                    | -0.24                              | 5          |
| 131.31                                                        | 131.45                                                    | +0.14                              | 2          |
| 126.22                                                        | 126.11                                                    | -0.11                              | 3          |
| 121.67                                                        | 121.34                                                    | -0.33                              | 4          |
| 116.02                                                        | 115.96                                                    | -0.06                              | 6          |
| 26.73                                                         | 26.60                                                     | -0.13                              | 8          |
| 22.66                                                         | 22.62                                                     | -0.02                              | 9 and 10   |
| 20.83                                                         | 20.80                                                     | -0.03                              | 7          |
