# Supplementary material
Source: PubMed Central journal article supplement (PMC6855275)
Supplement: Supp_Table3.pdf [file Supp_Table3.pdf]

**Supplementary Table S3.** Carvacrol and thymol concentrations and integral values for calibration curves, below the <sup>1</sup>H nuclear magnetic resonance calibration plots for thymol and carvacrol are shown

| <i>CAR Concentration<br/>(% w/w Refer<br/>to PCL)</i> | <i>CAR Integral<br/>(7.06 ppm) Value</i> | <i>THY Concentration<br/>(% w/w Refer to PCL)</i> | <i>THY Integral<br/>(7.08 ppm) Value</i> |
|-------------------------------------------------------|------------------------------------------|---------------------------------------------------|------------------------------------------|
| 1.96                                                  | 0.56                                     | 1.64                                              | 0.46                                     |
| 3.84                                                  | 1.05                                     | 3.22                                              | 0.83                                     |
| 5.66                                                  | 1.57                                     | 4.76                                              | 1.48                                     |
| 7.41                                                  | 2.16                                     | 6.25                                              | 1.78                                     |
| 9.09                                                  | 2.80                                     | 7.69                                              | 2.24                                     |
| 10.71                                                 | 3.19                                     | 9.09                                              | 2.66                                     |
| 12.28                                                 | 3.90                                     | 10.45                                             | 3.11                                     |
| 13.79                                                 | 4.37                                     | 11.76                                             | 3.52                                     |
| 15.25                                                 | 4.98                                     | 13.04                                             | 3.98                                     |
| 16.67                                                 | 5.58                                     | 14.28                                             | 4.44                                     |
| 18.03                                                 | 5.90                                     | 15.49                                             | 4.89                                     |
| 19.35                                                 | 6.25                                     | 16.67                                             | 5.30                                     |
| 20.63                                                 | 6.75                                     | 17.81                                             | 5.82                                     |
